# Supplementary material
Source: MDPI journal article supplement (https://www.mdpi.com/2079-9276/8/4/170)
Supplement: s1 [file s1]

**Table S1.** Total (inputs and outputs) background processes requirements for current scenario of oysters farming (amount cut-off 0.1)

| **Process** | **Amount** | **Unit** |
| --- | --- | --- |
| drying, natural gas - NO | 64.24591 | l |
| natural gas, at long-distance pipeline - RER | 58.61387 | l |
| natural gas, at production onshore - RU | 33.19085 | l |
| natural gas, production RU, at long-distance pipeline - RER | 28.33435 | l |
| natural gas, at production onshore - DZ | 22.09499 | l |
| natural gas, production NL, at long-distance pipeline - RER | 20.88607 | l |
| natural gas, production DZ, at long-distance pipeline - RER | 16.07970 | l |
| natural gas, at production offshore - NO | 15.04806 | l |
| natural gas, at production onshore - NL | 14.95905 | l |
| natural gas, production NO, at long-distance pipeline - RER | 14.16923 | l |
| Oyster farming: current scenario - IT | 12.00000 | Item(s) |
| Oyster seeds purchased from France | 12.00000 | Item(s) |
| Fattening in open sea | 12.00000 | Item(s) |
| Pre-fattening in open sea | 12.00000 | Item(s) |
| sweetening, natural gas - DE | 9.96718 | l |
| heavy fuel oil, burned in industrial furnace 1MW, non-modulating - RER | 7.14766 | MJ |
| natural gas, liquefied, at freight ship - DZ | 6.75348 | l |
| natural gas, production DZ, at evaporation plant - RER | 6.75348 | l |
| natural gas, liquefied, at liquefaction plant - DZ | 6.75348 | l |
| natural gas, at production onshore - DE | 6.65803 | l |
| natural gas, at production offshore - NL | 6.23339 | l |
| natural gas, production DE, at long-distance pipeline - RER | 6.20688 | l |
| hard coal coke, at plant - RER | 4.20086 | MJ |
| transport, transoceanic freight ship - OCE | 3.27204 | t*km |
| operation, transoceanic freight ship - OCE | 3.27204 | t*km |
| electricity, production mix UCTE - UCTE | 2.74262 | MJ |
| electricity, high voltage, production UCTE, at grid - UCTE | 2.69696 | MJ |
| electricity, medium voltage, production UCTE, at grid - UCTE | 2.43645 | MJ |
| natural gas, at production offshore - GB | 2.38222 | l |
| natural gas, production GB, at long-distance pipeline - RER | 2.38181 | l |
| natural gas, high pressure, at consumer - RER | 2.12959 | MJ |
| water, decarbonised, at plant - RER | 1.65573 | kg |
| wood chips, from industry, hardwood, burned in furnace 50kW - CH | 1.62213 | MJ |
| sweet gas, burned in gas turbine, production - NO | 1.59406 | l |
| disposal, spoil from lignite mining, in surface landfill - GLO | 1.58197 | kg |
| transport, transoceanic tanker - OCE | 1.46801 | t*km |
| operation, transoceanic tanker - OCE | 1.46801 | t*km |
| disposal, spoil from coal mining, in surface landfill - GLO | 1.43620 | kg |
| natural gas, burned in industrial furnace >100kW - RER | 1.20934 | MJ |
| iron ore, 46% Fe, at mine - GLO | 1.04397 | kg |
| Wooden cassettes | 1.00000 | Item(s) |
| biogas, production mix, at storage - CH | 0.91442 | l |
| hardwood, standing, under bark, in forest - RER | 0.87881 | l |
| hardwood, stand establishment / tending / site development, under bark - RER | 0.87881 | l |
| operation, freight train - RER | 0.78448 | t*km |
| transport, freight, rail - RER | 0.78448 | t*km |
| treatment, pig iron production effluent, to wastewater treatment, class 3 - CH | 0.67173 | l |
| natural gas, vented - GLO | 0.66159 | l |
| iron ore, 65% Fe, at beneficiation - GLO | 0.62958 | kg |
| electricity, production mix DE - DE | 0.62819 | MJ |
| electricity, production mix FR - FR | 0.59593 | MJ |
| hot rolling, steel - RER | 0.56636 | kg |
| reinforcing steel, at plant - RER | 0.55631 | kg |
| round wood, hardwood, under bark, u=70%, at forest road - RER | 0.54620 | l |
| disposal, sulfidic tailings, off-site - GLO | 0.50806 | kg |
| electricity, nuclear, at power plant pressure water reactor - FR | 0.50722 | MJ |
| lignite, burned in power plant - DE | 0.49165 | MJ |
| biogas, from sewage sludge, at storage - CH | 0.47550 | l |
| transport, crude oil pipeline, onshore - RER | 0.46611 | t*km |
| biogas, from biowaste, at storage - CH | 0.43892 | l |
| hard coal, burned in power plant - DE | 0.41017 | MJ |
| sinter, iron, at plant - GLO | 0.38993 | kg |
| natural gas, high pressure, at consumer - IT | 0.37947 | MJ |
| natural gas, burned in power plant - IT | 0.37947 | MJ |
| steel, converter, unalloyed, at plant - RER | 0.37907 | kg |
| natural gas, at long-distance pipeline - CH | 0.37246 | l |
| pig iron, at plant - GLO | 0.37136 | kg |
| treatment, plywood production effluent, to wastewater treatment, class 3 - CH | 0.36803 | l |
| refinery gas, burned in furnace - RER | 0.35905 | MJ |
| natural gas, sweet, burned in production flare - GLO | 0.34431 | l |
| electricity, hydropower, at run-of-river power plant - RER | 0.33751 | MJ |
| iron scrap, at plant - RER | 0.32731 | kg |
| electricity, production mix IT - IT | 0.31406 | MJ |
| excavation, skid-steer loader - RER | 0.30262 | l |
| electricity, production mix ES - ES | 0.29172 | MJ |
| hard coal, burned in industrial furnace 1-10MW - RER | 0.28570 | MJ |
| operation, passenger car - RER | 0.27858 | m |
| hard coal mix, at regional storage - UCTE | 0.27340 | kg |
| hard coal, burned in power plant - PL | 0.27233 | MJ |
| electricity, nuclear, at power plant - UCTE | 0.20957 | MJ |
| diesel, burned in building machine - GLO | 0.20881 | MJ |
| steel, electric, un- and low-alloyed, at plant - RER | 0.20682 | kg |
| lignite, burned in power plant - PL | 0.20568 | MJ |
| heavy fuel oil, at refinery - RER | 0.20278 | kg |
| hard coal, burned in power plant - ES | 0.20266 | MJ |
| transport, lorry >16t, fleet average - RER | 0.20228 | t*km |
| plywood, indoor use, at plant - RER | 0.20000 | l |
| heavy fuel oil, at regional storage - RER | 0.19976 | kg |
| gravel, crushed, at mine - CH | 0.19303 | kg |
| electricity, nuclear, at power plant pressure water reactor - UCTE | 0.18862 | MJ |
| limestone, at mine - CH | 0.18740 | kg |
| tap water, at user - RER | 0.17922 | kg |
| electricity, nuclear, at power plant - DE | 0.17645 | MJ |
| natural gas, burned in power plant - NL | 0.17515 | MJ |
| natural gas, high pressure, at consumer - NL | 0.17515 | MJ |
| lignite, burned in power plant - CZ | 0.17126 | MJ |
| electricity, lignite, at power plant - DE | 0.16238 | MJ |
| natural gas, burned in gas turbine, for compressor station - RU | 0.16049 | MJ |
| natural gas, sweet, burned in production flare - GLO | 0.15988 | MJ |
| electricity, production mix PL - PL | 0.15264 | MJ |
| natural gas, high pressure, at consumer - DE | 0.15207 | MJ |
| natural gas, burned in power plant - DE | 0.15207 | MJ |
| pellets, iron, at plant - GLO | 0.14854 | kg |
| electricity, hard coal, at power plant - DE | 0.14766 | MJ |
| process-specific burdens, residual material landfill - CH | 0.14432 | kg |
| natural gas, burned in industrial furnace low-NOx >100kW - RER | 0.14380 | MJ |
| electricity, natural gas, at power plant - IT | 0.14230 | MJ |
| lignite, at mine - RER | 0.14214 | kg |
| transport, natural gas, pipeline, long distance - RU | 0.13600 | t*km |
| hard coal, at mine - EEU | 0.13494 | kg |
| hard coal, at regional storage - EEU | 0.13494 | kg |
| heavy fuel oil, burned in power plant - IT | 0.13389 | MJ |
| hard coal, burned in power plant - IT | 0.12750 | MJ |
| electricity, nuclear, at power plant pressure water reactor - DE | 0.12528 | MJ |
| natural gas, high pressure, at consumer - ES | 0.12430 | MJ |
| natural gas, burned in power plant - ES | 0.12430 | MJ |
| heavy fuel oil, burned in refinery furnace - RER | 0.12323 | MJ |
| gravel, round, at mine - CH | 0.11042 | kg |
| disposal, tailings from hard coal milling, in impoundment - GLO | 0.10590 | kg |
| electricity, production mix NL - NL | 0.10463 | MJ |
| discharge, produced water, onshore - GLO | 0.10403 | kg |
| natural gas, burned in power plant - CENTREL | 0.10285 | MJ |
| lignite, burned in power plant - GR | 0.10154 | MJ |

**Table S2.** Total (inputs and outputs) background processes requirements for alternative scenario of oysters farming (amount cut-off 0.1)

| **Process** | **Amount** | **Unit** |
| --- | --- | --- |
| drying, natural gas - NO | 64.27725 | l |
| natural gas, at long-distance pipeline - RER | 58.75135 | l |
| natural gas, at production onshore - RU | 33.19453 | l |
| natural gas, production RU, at long-distance pipeline - RER | 28.33750 | l |
| natural gas, at production onshore - DZ | 22.12065 | l |
| natural gas, production NL, at long-distance pipeline - RER | 20.88531 | l |
| natural gas, production DZ, at long-distance pipeline - RER | 16.10234 | l |
| natural gas, at production offshore - NO | 15.05142 | l |
| natural gas, at production onshore - NL | 14.95850 | l |
| natural gas, production NO, at long-distance pipeline - RER | 14.17230 | l |
| Oyster farming: alternative scenario | 12.00000 | Item(s) |
| Oyster seeds in situ | 12.00000 | Item(s) |
| Fattening in open sea-seed in situ | 12.00000 | Item(s) |
| Pre-fattening in open sea-seed in situ | 12.00000 | Item(s) |
| sweetening, natural gas - DE | 9.96567 | l |
| heavy fuel oil, burned in industrial furnace 1MW, non-modulating - RER | 7.14767 | MJ |
| natural gas, liquefied, at liquefaction plant - DZ | 6.76298 | l |
| natural gas, liquefied, at freight ship - DZ | 6.76298 | l |
| natural gas, production DZ, at evaporation plant - RER | 6.76298 | l |
| natural gas, at production onshore - DE | 6.65353 | l |
| natural gas, at production offshore - NL | 6.23318 | l |
| natural gas, production DE, at long-distance pipeline - RER | 6.20243 | l |
| hard coal coke, at plant - RER | 4.20086 | MJ |
| operation, transoceanic freight ship - OCE | 3.27358 | t*km |
| transport, transoceanic freight ship - OCE | 3.27358 | t*km |
| electricity, production mix UCTE - UCTE | 2.74523 | MJ |
| electricity, high voltage, production UCTE, at grid - UCTE | 2.69977 | MJ |
| electricity, medium voltage, production UCTE, at grid - UCTE | 2.43916 | MJ |
| natural gas, at production offshore - GB | 2.38060 | l |
| natural gas, production GB, at long-distance pipeline - RER | 2.38019 | l |
| natural gas, high pressure, at consumer - RER | 2.13467 | MJ |
| water, decarbonised, at plant - RER | 1.64719 | kg |
| wood chips, from industry, hardwood, burned in furnace 50kW - CH | 1.62213 | MJ |
| sweet gas, burned in gas turbine, production - NO | 1.59365 | l |
| disposal, spoil from lignite mining, in surface landfill - GLO | 1.58374 | kg |
| operation, transoceanic tanker - OCE | 1.46615 | t*km |
| transport, transoceanic tanker - OCE | 1.46615 | t*km |
| disposal, spoil from coal mining, in surface landfill - GLO | 1.43665 | kg |
| natural gas, burned in industrial furnace >100kW - RER | 1.20961 | MJ |
| iron ore, 46% Fe, at mine - GLO | 1.04392 | kg |
| Wooden cassettes | 1.00000 | Item(s) |
| biogas, production mix, at storage - CH | 0.91512 | l |
| hardwood, standing, under bark, in forest - RER | 0.87882 | l |
| hardwood, stand establishment / tending / site development, under bark - RER | 0.87882 | l |
| operation, freight train - RER | 0.78462 | t*km |
| transport, freight, rail - RER | 0.78462 | t*km |
| treatment, pig iron production effluent, to wastewater treatment, class 3 - CH | 0.67170 | l |
| natural gas, vented - GLO | 0.65930 | l |
| iron ore, 65% Fe, at beneficiation - GLO | 0.62955 | kg |
| electricity, production mix DE - DE | 0.62878 | MJ |
| electricity, production mix FR - FR | 0.59650 | MJ |
| hot rolling, steel - RER | 0.56635 | kg |
| reinforcing steel, at plant - RER | 0.55628 | kg |
| round wood, hardwood, under bark, u=70%, at forest road - RER | 0.54620 | l |
| disposal, sulfidic tailings, off-site - GLO | 0.50921 | kg |
| electricity, nuclear, at power plant pressure water reactor - FR | 0.50754 | MJ |
| lignite, burned in power plant - DE | 0.49223 | MJ |
| biogas, from sewage sludge, at storage - CH | 0.47586 | l |
| transport, crude oil pipeline, onshore - RER | 0.46559 | t*km |
| biogas, from biowaste, at storage - CH | 0.43926 | l |
| hard coal, burned in power plant - DE | 0.41086 | MJ |
| sinter, iron, at plant - GLO | 0.38991 | kg |
| natural gas, high pressure, at consumer - IT | 0.37983 | MJ |
| natural gas, burned in power plant - IT | 0.37983 | MJ |
| steel, converter, unalloyed, at plant - RER | 0.37905 | kg |
| pig iron, at plant - GLO | 0.37134 | kg |
| treatment, plywood production effluent, to wastewater treatment, class 3 - CH | 0.36803 | l |
| refinery gas, burned in furnace - RER | 0.35859 | MJ |
| natural gas, sweet, burned in production flare - GLO | 0.34423 | l |
| electricity, hydropower, at run-of-river power plant - RER | 0.33980 | MJ |
| iron scrap, at plant - RER | 0.32730 | kg |
| electricity, production mix IT - IT | 0.31436 | MJ |
| excavation, skid-steer loader - RER | 0.29964 | l |
| electricity, production mix ES - ES | 0.29200 | MJ |
| hard coal, burned in industrial furnace 1-10MW - RER | 0.28583 | MJ |
| operation, passenger car - RER | 0.27831 | m |
| hard coal mix, at regional storage - UCTE | 0.27340 | kg |
| hard coal, burned in power plant - PL | 0.27259 | MJ |
| natural gas, at long-distance pipeline - CH | 0.22965 | l |
| electricity, nuclear, at power plant - UCTE | 0.20996 | MJ |
| diesel, burned in building machine - GLO | 0.20838 | MJ |
| steel, electric, un- and low-alloyed, at plant - RER | 0.20681 | kg |
| lignite, burned in power plant - PL | 0.20588 | MJ |
| hard coal, burned in power plant - ES | 0.20296 | MJ |
| heavy fuel oil, at refinery - RER | 0.20279 | kg |
| transport, lorry >16t, fleet average - RER | 0.20243 | t*km |
| plywood, indoor use, at plant - RER | 0.20000 | l |
| heavy fuel oil, at regional storage - RER | 0.19978 | kg |
| gravel, crushed, at mine - CH | 0.19174 | kg |
| electricity, nuclear, at power plant pressure water reactor - UCTE | 0.18897 | MJ |
| limestone, at mine - CH | 0.18744 | kg |
| tap water, at user - RER | 0.17984 | kg |
| electricity, nuclear, at power plant - DE | 0.17662 | MJ |
| natural gas, burned in power plant - NL | 0.17531 | MJ |
| natural gas, high pressure, at consumer - NL | 0.17531 | MJ |
| lignite, burned in power plant - CZ | 0.17143 | MJ |
| electricity, lignite, at power plant - DE | 0.16257 | MJ |
| natural gas, burned in gas turbine, for compressor station - RU | 0.16050 | MJ |
| natural gas, sweet, burned in production flare - GLO | 0.15928 | MJ |
| electricity, production mix PL - PL | 0.15279 | MJ |
| natural gas, high pressure, at consumer - DE | 0.15219 | MJ |
| natural gas, burned in power plant - DE | 0.15219 | MJ |
| pellets, iron, at plant - GLO | 0.14854 | kg |
| electricity, hard coal, at power plant - DE | 0.14791 | MJ |
| process-specific burdens, residual material landfill - CH | 0.14443 | kg |
| natural gas, burned in industrial furnace low-NOx >100kW - RER | 0.14421 | MJ |
| electricity, natural gas, at power plant - IT | 0.14244 | MJ |
| lignite, at mine - RER | 0.14230 | kg |
| transport, natural gas, pipeline, long distance - RU | 0.13602 | t*km |
| hard coal, at mine - EEU | 0.13496 | kg |
| hard coal, at regional storage - EEU | 0.13496 | kg |
| heavy fuel oil, burned in power plant - IT | 0.13411 | MJ |
| hard coal, burned in power plant - IT | 0.12767 | MJ |
| electricity, nuclear, at power plant pressure water reactor - DE | 0.12540 | MJ |
| natural gas, high pressure, at consumer - ES | 0.12442 | MJ |
| natural gas, burned in power plant - ES | 0.12442 | MJ |
| heavy fuel oil, burned in refinery furnace - RER | 0.12307 | MJ |
| gravel, round, at mine - CH | 0.11037 | kg |
| operation, van < 3,5t - CH | 0.10661 | m |
| disposal, tailings from hard coal milling, in impoundment - GLO | 0.10594 | kg |
| electricity, production mix NL - NL | 0.10472 | MJ |
| discharge, produced water, onshore - GLO | 0.10387 | kg |
| natural gas, burned in power plant - CENTREL | 0.10295 | MJ |
| lignite, burned in power plant - GR | 0.10166 | MJ |
