# Supplementary material
Source: MDPI journal article supplement (https://www.mdpi.com/2079-9276/8/4/170)
Supplement: s2 [file s2]

**Table S1.** Total (inputs and outputs) background processes requirements for current scenario of oysters farming (amount cut-off 0.1)

| Process                                                                | Amount   | Unit    |
|------------------------------------------------------------------------|----------|---------|
| drying, natural gas - NO                                               | 64.24591 | l       |
| natural gas, at long-distance pipeline - RER                           | 58.61387 | l       |
| natural gas, at production onshore - RU                                | 33.19085 | l       |
| natural gas, production RU, at long-distance pipeline - RER            | 28.33435 | l       |
| natural gas, at production onshore - DZ                                | 22.09499 | l       |
| natural gas, production NL, at long-distance pipeline - RER            | 20.88607 | l       |
| natural gas, production DZ, at long-distance pipeline - RER            | 16.07970 | l       |
| natural gas, at production offshore - NO                               | 15.04806 | l       |
| natural gas, at production onshore - NL                                | 14.95905 | l       |
| natural gas, production NO, at long-distance pipeline - RER            | 14.16923 | l       |
| Oyster farming: current scenario - IT                                  | 12.00000 | Item(s) |
| Oyster seeds purchased from France                                     | 12.00000 | Item(s) |
| Fattening in open sea                                                  | 12.00000 | Item(s) |
| Pre-fattening in open sea                                              | 12.00000 | Item(s) |
| sweetening, natural gas - DE                                           | 9.96718  | l       |
| heavy fuel oil, burned in industrial furnace 1MW, non-modulating - RER | 7.14766  | MJ      |
| natural gas, liquefied, at freight ship - DZ                           | 6.75348  | l       |
| natural gas, production DZ, at evaporation plant - RER                 | 6.75348  | l       |
| natural gas, liquefied, at liquefaction plant - DZ                     | 6.75348  | l       |
| natural gas, at production onshore - DE                                | 6.65803  | l       |
| natural gas, at production offshore - NL                               | 6.23339  | l       |
| natural gas, production DE, at long-distance pipeline - RER            | 6.20688  | l       |
| hard coal coke, at plant - RER                                         | 4.20086  | MJ      |
| transport, transoceanic freight ship - OCE                             | 3.27204  | t*km    |
| operation, transoceanic freight ship - OCE                             | 3.27204  | t*km    |
| electricity, production mix UCTE - UCTE                                | 2.74262  | MJ      |
| electricity, high voltage, production UCTE, at grid - UCTE             | 2.69696  | MJ      |
| electricity, medium voltage, production UCTE, at grid - UCTE           | 2.43645  | MJ      |
| natural gas, at production offshore - GB                               | 2.38222  | l       |
| natural gas, production GB, at long-distance pipeline - RER            | 2.38181  | l       |
| natural gas, high pressure, at consumer - RER                          | 2.12959  | MJ      |
| water, decarbonised, at plant - RER                                    | 1.65573  | kg      |
| wood chips, from industry, hardwood, burned in furnace 50kW - CH       | 1.62213  | MJ      |
| sweet gas, burned in gas turbine, production - NO                      | 1.59406  | l       |
| disposal, spoil from lignite mining, in surface landfill - GLO         | 1.58197  | kg      |
| transport, transoceanic tanker - OCE                                   | 1.46801  | t*km    |
| operation, transoceanic tanker - OCE                                   | 1.46801  | t*km    |
| disposal, spoil from coal mining, in surface landfill - GLO            | 1.43620  | kg      |
| natural gas, burned in industrial furnace >100kW - RER                 | 1.20934  | MJ      |

|                                                                                |         |         |
|--------------------------------------------------------------------------------|---------|---------|
| iron ore, 46% Fe, at mine - GLO                                                | 1.04397 | kg      |
| Wooden cassettes                                                               | 1.00000 | Item(s) |
| biogas, production mix, at storage - CH                                        | 0.91442 | l       |
| hardwood, standing, under bark, in forest - RER                                | 0.87881 | l       |
| hardwood, stand establishment / tending / site development, under bark - RER   | 0.87881 | l       |
| operation, freight train - RER                                                 | 0.78448 | t*km    |
| transport, freight, rail - RER                                                 | 0.78448 | t*km    |
| treatment, pig iron production effluent, to wastewater treatment, class 3 - CH | 0.67173 | l       |
| natural gas, vented - GLO                                                      | 0.66159 | l       |
| iron ore, 65% Fe, at beneficiation - GLO                                       | 0.62958 | kg      |
| electricity, production mix DE - DE                                            | 0.62819 | MJ      |
| electricity, production mix FR - FR                                            | 0.59593 | MJ      |
| hot rolling, steel - RER                                                       | 0.56636 | kg      |
| reinforcing steel, at plant - RER                                              | 0.55631 | kg      |
| round wood, hardwood, under bark, u=70%, at forest road - RER                  | 0.54620 | l       |
| disposal, sulfidic tailings, off-site - GLO                                    | 0.50806 | kg      |
| electricity, nuclear, at power plant pressure water reactor - FR               | 0.50722 | MJ      |
| lignite, burned in power plant - DE                                            | 0.49165 | MJ      |
| biogas, from sewage sludge, at storage - CH                                    | 0.47550 | l       |
| transport, crude oil pipeline, onshore - RER                                   | 0.46611 | t*km    |
| biogas, from biowaste, at storage - CH                                         | 0.43892 | l       |
| hard coal, burned in power plant - DE                                          | 0.41017 | MJ      |
| sinter, iron, at plant - GLO                                                   | 0.38993 | kg      |
| natural gas, high pressure, at consumer - IT                                   | 0.37947 | MJ      |
| natural gas, burned in power plant - IT                                        | 0.37947 | MJ      |
| steel, converter, unalloyed, at plant - RER                                    | 0.37907 | kg      |
| natural gas, at long-distance pipeline - CH                                    | 0.37246 | l       |
| pig iron, at plant - GLO                                                       | 0.37136 | kg      |
| treatment, plywood production effluent, to wastewater treatment, class 3 - CH  | 0.36803 | l       |
| refinery gas, burned in furnace - RER                                          | 0.35905 | MJ      |
| natural gas, sweet, burned in production flare - GLO                           | 0.34431 | l       |
| electricity, hydropower, at run-of-river power plant - RER                     | 0.33751 | MJ      |
| iron scrap, at plant - RER                                                     | 0.32731 | kg      |
| electricity, production mix IT - IT                                            | 0.31406 | MJ      |
| excavation, skid-steer loader - RER                                            | 0.30262 | l       |
| electricity, production mix ES - ES                                            | 0.29172 | MJ      |
| hard coal, burned in industrial furnace 1-10MW - RER                           | 0.28570 | MJ      |
| operation, passenger car - RER                                                 | 0.27858 | m       |
| hard coal mix, at regional storage - UCTE                                      | 0.27340 | kg      |
| hard coal, burned in power plant - PL                                          | 0.27233 | MJ      |
| electricity, nuclear, at power plant - UCTE                                    | 0.20957 | MJ      |

|                                                                    |         |      |
|--------------------------------------------------------------------|---------|------|
| diesel, burned in building machine - GLO                           | 0.20881 | MJ   |
| steel, electric, un- and low-alloyed, at plant - RER               | 0.20682 | kg   |
| lignite, burned in power plant - PL                                | 0.20568 | MJ   |
| heavy fuel oil, at refinery - RER                                  | 0.20278 | kg   |
| hard coal, burned in power plant - ES                              | 0.20266 | MJ   |
| transport, lorry >16t, fleet average - RER                         | 0.20228 | t*km |
| plywood, indoor use, at plant - RER                                | 0.20000 | l    |
| heavy fuel oil, at regional storage - RER                          | 0.19976 | kg   |
| gravel, crushed, at mine - CH                                      | 0.19303 | kg   |
| electricity, nuclear, at power plant pressure water reactor - UCTE | 0.18862 | MJ   |
| limestone, at mine - CH                                            | 0.18740 | kg   |
| tap water, at user - RER                                           | 0.17922 | kg   |
| electricity, nuclear, at power plant - DE                          | 0.17645 | MJ   |
| natural gas, burned in power plant - NL                            | 0.17515 | MJ   |
| natural gas, high pressure, at consumer - NL                       | 0.17515 | MJ   |
| lignite, burned in power plant - CZ                                | 0.17126 | MJ   |
| electricity, lignite, at power plant - DE                          | 0.16238 | MJ   |
| natural gas, burned in gas turbine, for compressor station - RU    | 0.16049 | MJ   |
| natural gas, sweet, burned in production flare - GLO               | 0.15988 | MJ   |
| electricity, production mix PL - PL                                | 0.15264 | MJ   |
| natural gas, high pressure, at consumer - DE                       | 0.15207 | MJ   |
| natural gas, burned in power plant - DE                            | 0.15207 | MJ   |
| pellets, iron, at plant - GLO                                      | 0.14854 | kg   |
| electricity, hard coal, at power plant - DE                        | 0.14766 | MJ   |
| process-specific burdens, residual material landfill - CH          | 0.14432 | kg   |
| natural gas, burned in industrial furnace low-NOx >100kW - RER     | 0.14380 | MJ   |
| electricity, natural gas, at power plant - IT                      | 0.14230 | MJ   |
| lignite, at mine - RER                                             | 0.14214 | kg   |
| transport, natural gas, pipeline, long distance - RU               | 0.13600 | t*km |
| hard coal, at mine - EEU                                           | 0.13494 | kg   |
| hard coal, at regional storage - EEU                               | 0.13494 | kg   |
| heavy fuel oil, burned in power plant - IT                         | 0.13389 | MJ   |
| hard coal, burned in power plant - IT                              | 0.12750 | MJ   |
| electricity, nuclear, at power plant pressure water reactor - DE   | 0.12528 | MJ   |
| natural gas, high pressure, at consumer - ES                       | 0.12430 | MJ   |
| natural gas, burned in power plant - ES                            | 0.12430 | MJ   |
| heavy fuel oil, burned in refinery furnace - RER                   | 0.12323 | MJ   |
| gravel, round, at mine - CH                                        | 0.11042 | kg   |
| disposal, tailings from hard coal milling, in impoundment - GLO    | 0.10590 | kg   |
| electricity, production mix NL - NL                                | 0.10463 | MJ   |
| discharge, produced water, onshore - GLO                           | 0.10403 | kg   |

|                                              |         |    |
|----------------------------------------------|---------|----|
| natural gas, burned in power plant - CENTREL | 0.10285 | MJ |
| lignite, burned in power plant - GR          | 0.10154 | MJ |

**Table S2.** Total (inputs and outputs) background processes requirements for alternative scenario of oysters farming (amount cut-off 0.1)

| Process                                                                | Amount   | Unit    |
|------------------------------------------------------------------------|----------|---------|
| drying, natural gas - NO                                               | 64.27725 | l       |
| natural gas, at long-distance pipeline - RER                           | 58.75135 | l       |
| natural gas, at production onshore - RU                                | 33.19453 | l       |
| natural gas, production RU, at long-distance pipeline - RER            | 28.33750 | l       |
| natural gas, at production onshore - DZ                                | 22.12065 | l       |
| natural gas, production NL, at long-distance pipeline - RER            | 20.88531 | l       |
| natural gas, production DZ, at long-distance pipeline - RER            | 16.10234 | l       |
| natural gas, at production offshore - NO                               | 15.05142 | l       |
| natural gas, at production onshore - NL                                | 14.95850 | l       |
| natural gas, production NO, at long-distance pipeline - RER            | 14.17230 | l       |
| Oyster farming: alternative scenario                                   | 12.00000 | Item(s) |
| Oyster seeds in situ                                                   | 12.00000 | Item(s) |
| Fattening in open sea-seed in situ                                     | 12.00000 | Item(s) |
| Pre-fattening in open sea-seed in situ                                 | 12.00000 | Item(s) |
| sweetening, natural gas - DE                                           | 9.96567  | l       |
| heavy fuel oil, burned in industrial furnace 1MW, non-modulating - RER | 7.14767  | MJ      |
| natural gas, liquefied, at liquefaction plant - DZ                     | 6.76298  | l       |
| natural gas, liquefied, at freight ship - DZ                           | 6.76298  | l       |
| natural gas, production DZ, at evaporation plant - RER                 | 6.76298  | l       |
| natural gas, at production onshore - DE                                | 6.65353  | l       |
| natural gas, at production offshore - NL                               | 6.23318  | l       |
| natural gas, production DE, at long-distance pipeline - RER            | 6.20243  | l       |
| hard coal coke, at plant - RER                                         | 4.20086  | MJ      |
| operation, transoceanic freight ship - OCE                             | 3.27358  | t*km    |
| transport, transoceanic freight ship - OCE                             | 3.27358  | t*km    |
| electricity, production mix UCTE - UCTE                                | 2.74523  | MJ      |
| electricity, high voltage, production UCTE, at grid - UCTE             | 2.69977  | MJ      |
| electricity, medium voltage, production UCTE, at grid - UCTE           | 2.43916  | MJ      |
| natural gas, at production offshore - GB                               | 2.38060  | l       |
| natural gas, production GB, at long-distance pipeline - RER            | 2.38019  | l       |
| natural gas, high pressure, at consumer - RER                          | 2.13467  | MJ      |
| water, decarbonised, at plant - RER                                    | 1.64719  | kg      |
| wood chips, from industry, hardwood, burned in furnace 50kW - CH       | 1.62213  | MJ      |
| sweet gas, burned in gas turbine, production - NO                      | 1.59365  | l       |
| disposal, spoil from lignite mining, in surface landfill - GLO         | 1.58374  | kg      |

|                                                                                |         |         |
|--------------------------------------------------------------------------------|---------|---------|
| operation, transoceanic tanker - OCE                                           | 1.46615 | t*km    |
| transport, transoceanic tanker - OCE                                           | 1.46615 | t*km    |
| disposal, spoil from coal mining, in surface landfill - GLO                    | 1.43665 | kg      |
| natural gas, burned in industrial furnace >100kW - RER                         | 1.20961 | MJ      |
| iron ore, 46% Fe, at mine - GLO                                                | 1.04392 | kg      |
| Wooden cassettes                                                               | 1.00000 | Item(s) |
| biogas, production mix, at storage - CH                                        | 0.91512 | l       |
| hardwood, standing, under bark, in forest - RER                                | 0.87882 | l       |
| hardwood, stand establishment / tending / site development, under bark - RER   | 0.87882 | l       |
| operation, freight train - RER                                                 | 0.78462 | t*km    |
| transport, freight, rail - RER                                                 | 0.78462 | t*km    |
| treatment, pig iron production effluent, to wastewater treatment, class 3 - CH | 0.67170 | l       |
| natural gas, vented - GLO                                                      | 0.65930 | l       |
| iron ore, 65% Fe, at beneficiation - GLO                                       | 0.62955 | kg      |
| electricity, production mix DE - DE                                            | 0.62878 | MJ      |
| electricity, production mix FR - FR                                            | 0.59650 | MJ      |
| hot rolling, steel - RER                                                       | 0.56635 | kg      |
| reinforcing steel, at plant - RER                                              | 0.55628 | kg      |
| round wood, hardwood, under bark, u=70%, at forest road - RER                  | 0.54620 | l       |
| disposal, sulfidic tailings, off-site - GLO                                    | 0.50921 | kg      |
| electricity, nuclear, at power plant pressure water reactor - FR               | 0.50754 | MJ      |
| lignite, burned in power plant - DE                                            | 0.49223 | MJ      |
| biogas, from sewage sludge, at storage - CH                                    | 0.47586 | l       |
| transport, crude oil pipeline, onshore - RER                                   | 0.46559 | t*km    |
| biogas, from biowaste, at storage - CH                                         | 0.43926 | l       |
| hard coal, burned in power plant - DE                                          | 0.41086 | MJ      |
| sinter, iron, at plant - GLO                                                   | 0.38991 | kg      |
| natural gas, high pressure, at consumer - IT                                   | 0.37983 | MJ      |
| natural gas, burned in power plant - IT                                        | 0.37983 | MJ      |
| steel, converter, unalloyed, at plant - RER                                    | 0.37905 | kg      |
| pig iron, at plant - GLO                                                       | 0.37134 | kg      |
| treatment, plywood production effluent, to wastewater treatment, class 3 - CH  | 0.36803 | l       |
| refinery gas, burned in furnace - RER                                          | 0.35859 | MJ      |
| natural gas, sweet, burned in production flare - GLO                           | 0.34423 | l       |
| electricity, hydropower, at run-of-river power plant - RER                     | 0.33980 | MJ      |
| iron scrap, at plant - RER                                                     | 0.32730 | kg      |
| electricity, production mix IT - IT                                            | 0.31436 | MJ      |
| excavation, skid-steer loader - RER                                            | 0.29964 | l       |
| electricity, production mix ES - ES                                            | 0.29200 | MJ      |
| hard coal, burned in industrial furnace 1-10MW - RER                           | 0.28583 | MJ      |
| operation, passenger car - RER                                                 | 0.27831 | m       |

|                                                                    |         |      |
|--------------------------------------------------------------------|---------|------|
| hard coal mix, at regional storage - UCTE                          | 0.27340 | kg   |
| hard coal, burned in power plant - PL                              | 0.27259 | MJ   |
| natural gas, at long-distance pipeline - CH                        | 0.22965 | l    |
| electricity, nuclear, at power plant - UCTE                        | 0.20996 | MJ   |
| diesel, burned in building machine - GLO                           | 0.20838 | MJ   |
| steel, electric, un- and low-alloyed, at plant - RER               | 0.20681 | kg   |
| lignite, burned in power plant - PL                                | 0.20588 | MJ   |
| hard coal, burned in power plant - ES                              | 0.20296 | MJ   |
| heavy fuel oil, at refinery - RER                                  | 0.20279 | kg   |
| transport, lorry >16t, fleet average - RER                         | 0.20243 | t*km |
| plywood, indoor use, at plant - RER                                | 0.20000 | l    |
| heavy fuel oil, at regional storage - RER                          | 0.19978 | kg   |
| gravel, crushed, at mine - CH                                      | 0.19174 | kg   |
| electricity, nuclear, at power plant pressure water reactor - UCTE | 0.18897 | MJ   |
| limestone, at mine - CH                                            | 0.18744 | kg   |
| tap water, at user - RER                                           | 0.17984 | kg   |
| electricity, nuclear, at power plant - DE                          | 0.17662 | MJ   |
| natural gas, burned in power plant - NL                            | 0.17531 | MJ   |
| natural gas, high pressure, at consumer - NL                       | 0.17531 | MJ   |
| lignite, burned in power plant - CZ                                | 0.17143 | MJ   |
| electricity, lignite, at power plant - DE                          | 0.16257 | MJ   |
| natural gas, burned in gas turbine, for compressor station - RU    | 0.16050 | MJ   |
| natural gas, sweet, burned in production flare - GLO               | 0.15928 | MJ   |
| electricity, production mix PL - PL                                | 0.15279 | MJ   |
| natural gas, high pressure, at consumer - DE                       | 0.15219 | MJ   |
| natural gas, burned in power plant - DE                            | 0.15219 | MJ   |
| pellets, iron, at plant - GLO                                      | 0.14854 | kg   |
| electricity, hard coal, at power plant - DE                        | 0.14791 | MJ   |
| process-specific burdens, residual material landfill - CH          | 0.14443 | kg   |
| natural gas, burned in industrial furnace low-NOx >100kW - RER     | 0.14421 | MJ   |
| electricity, natural gas, at power plant - IT                      | 0.14244 | MJ   |
| lignite, at mine - RER                                             | 0.14230 | kg   |
| transport, natural gas, pipeline, long distance - RU               | 0.13602 | t*km |
| hard coal, at mine - EEU                                           | 0.13496 | kg   |
| hard coal, at regional storage - EEU                               | 0.13496 | kg   |
| heavy fuel oil, burned in power plant - IT                         | 0.13411 | MJ   |
| hard coal, burned in power plant - IT                              | 0.12767 | MJ   |
| electricity, nuclear, at power plant pressure water reactor - DE   | 0.12540 | MJ   |
| natural gas, high pressure, at consumer - ES                       | 0.12442 | MJ   |
| natural gas, burned in power plant - ES                            | 0.12442 | MJ   |
| heavy fuel oil, burned in refinery furnace - RER                   | 0.12307 | MJ   |

---

|                                                                 |         |    |
|-----------------------------------------------------------------|---------|----|
| gravel, round, at mine - CH                                     | 0.11037 | kg |
| operation, van < 3,5t - CH                                      | 0.10661 | m  |
| disposal, tailings from hard coal milling, in impoundment - GLO | 0.10594 | kg |
| electricity, production mix NL - NL                             | 0.10472 | MJ |
| discharge, produced water, onshore - GLO                        | 0.10387 | kg |
| natural gas, burned in power plant - CENTREL                    | 0.10295 | MJ |
| lignite, burned in power plant - GR                             | 0.10166 | MJ |

---
